# Supplementary material for: A chiroptical chemodosimeter for fast and specific detection of mercury(ii) ions in aqueous media
Source: Royal Society of Chemistry journal article supplement (doi:10.1039/c5ay02177d), 2015-01-01
Supplement: c5ay02177d1.pdf [file c5ay02177d1.pdf]

## **Supporting Information**

### **A chiroptical chemodosimeter for fast and specific recognition of mercury(II) ions in aqueous media**

Ganhong Du, Keyuan Liu, Beibei Liu, Long Ye and Liming Jiang\*

MOE Key Laboratory of Macromolecular Synthesis and Functionalization,

Department of Polymer Science and Engineering,

Zhejiang University, Hangzhou 310027, China

Fax: +86-571-87953727

E-mail: [cejlm@zju.edu.cn](mailto:cejlm@zju.edu.cn)

## General information

### Materials and instruments

All solvents were of analytical grade and were dried according to standard procedures if necessary. L-Phenylglycinol, methyl salicylate, and propargyl bromide were purchased from Aladdin Shanghai Reagent Co. and used without any further purification. Analytical grade  $\text{Hg}(\text{ClO}_4)_2 \cdot 3\text{H}_2\text{O}$ ,  $\text{Cu}(\text{NO}_3)_2$ ,  $\text{Zn}(\text{NO}_3)_2$ ,  $\text{Cd}(\text{NO}_3)_2$ ,  $\text{Ni}(\text{NO}_3)_2$ ,  $\text{Pb}(\text{NO}_3)_2$ ,  $\text{Mn}(\text{NO}_3)_2$ ,  $\text{Mg}(\text{NO}_3)_2$ ,  $\text{Ca}(\text{NO}_3)_2$ ,  $\text{Cr}(\text{NO}_3)_3$ ,  $\text{Al}(\text{NO}_3)_3$ ,  $\text{AgNO}_3$ ,  $\text{NaNO}_3$ ,  $\text{KNO}_3$  and other reagents were obtained from commercial sources and used as received unless noted otherwise.  $^1\text{H}$  and  $^{13}\text{C}$  NMR spectra were recorded on a Bruker Avance AMX-400 spectrometer using  $\text{CDCl}_3$  as a solvent; chemical shifts are represented in ppm with tetramethylsilane (TMS) as the internal reference. A Bruker Vector 22 Fourier Transform Infrared spectrometer was applied for recording spectra in KBr pellets. Electrospray ionization-mass spectrometry (ESI-MS) measurements were performed with a Varian 500 mass spectrometer. Steady-state fluorescence spectra were recorded on a Perkin-Elmer LS-55 fluorescence spectrometer in the right-angle geometry ( $90^\circ$  collecting optics). CD spectra were obtained in a buffer solution on a Biologic MOS-450 CD spectropolarimeter (France) at ambient temperature (cell length: 1 cm, scanning speed: 10 nm/sec). UV-vis absorption spectra were recorded on the same spectrometer for CD.

### Preparation of stock solutions for UV-vis, CD, and fluorescence studies

Spectral titration experiments were performed on  $10^{-4}$  M solution of probe **3** in HOAc-NaOAc buffer (containing 1% methanol) by adding aliquots of a solution of the selected salt at room temperature ( $\sim 25^\circ\text{C}$ ). Stock solutions of the metal ions ( $10^{-2}$  M) were prepared in deionized water as their nitrate salts except for  $\text{Hg}(\text{ClO}_4)_2$ . In titration experiments, the stock solution of **3** was directly mixed with the metal ion solution in a 3 ml quartz cuvette (path length = 1 cm) and then the spectrum was recorded. For fluorescence spectrum measurements, excitation was provided at 350 nm, and emission was collected from 250 to 550 nm.

**Table S1** Preparation of NaOAc-HOAc and NaH<sub>2</sub>PO<sub>4</sub>-Na<sub>2</sub>HPO<sub>4</sub> buffer solutions

| pH  | ingredients                                        |                                                    |
|-----|----------------------------------------------------|----------------------------------------------------|
| 3.6 | NaOAc (0.02 M), 0.75 mL                            | HOAc (0.02 M), 9.25 mL                             |
| 3.8 | NaOAc (0.02 M), 1.20 mL                            | HOAc (0.02 M), 8.80 mL                             |
| 4.0 | NaOAc (0.02 M), 1.80 mL                            | HOAc (0.02 M), 8.20 mL                             |
| 4.2 | NaOAc (0.02 M), 2.65 mL                            | HOAc (0.02 M), 7.35 mL                             |
| 4.4 | NaOAc (0.02 M), 3.70 mL                            | HOAc (0.02 M), 6.30 mL                             |
| 4.8 | NaOAc (0.02 M), 5.90 mL                            | HOAc (0.02 M), 4.10 mL                             |
| 5.0 | NaOAc (0.02 M), 7.00 mL                            | HOAc (0.02 M), 3.00 mL                             |
| 5.2 | NaOAc (0.02 M), 7.90 mL                            | HOAc (0.02 M), 2.10 mL                             |
| 5.4 | NaOAc (0.02 M), 8.60 mL                            | HOAc (0.02 M), 1.40 mL                             |
| 5.8 | NaOAc (0.02 M), 9.40 mL                            | HOAc (0.02 M), 0.60 mL                             |
| 7.0 | Na <sub>2</sub> HPO <sub>4</sub> (0.02 M), 6.10 mL | NaH <sub>2</sub> PO <sub>4</sub> (0.02 M), 3.90 mL |
| 8.0 | Na <sub>2</sub> HPO <sub>4</sub> (0.02 M), 9.47 mL | NaH <sub>2</sub> PO <sub>4</sub> (0.02 M), 0.53 mL |

## Synthesis and characterization

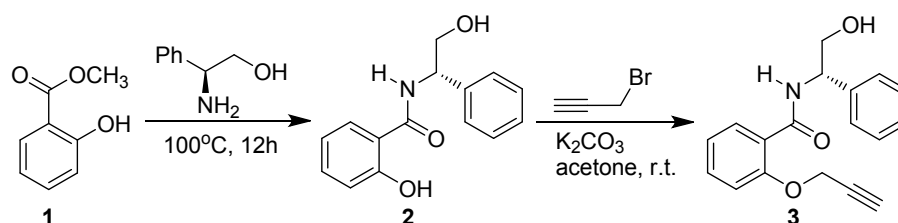**Scheme S1.** Synthetic route of probe 3.

### Synthesis of (*S*)-2-hydroxy-*N*-(2-hydroxy-1-phenylethyl)benzamide (**2**):

Both L-phenylglycinol (6.9 g, 50 mmol) and methyl salicylate (7.6 g, 50 mmol) were placed in a 100-mL three-necked flask fitted with a Dean-Stark trap and a reflux condenser. The mixture was heated to 100°C with violent magnetic stirring until ~1.5 mL of distillate was collected. The resulted residue was firstly purified via column chromatography using ethyl acetate : *n*-hexane (1:9) as the eluent afford 10.7 g of (*S*)-2-hydroxy-*N*-(2-hydroxy-1-phenylethyl)benzamide (**2**) (78%) as a white solid. Mp: 95.4–96.2°C; <sup>1</sup>H NMR (400 MHz, CDCl<sub>3</sub>): δ (ppm): 11.95 (s, 1H, OH), 7.39 (d, 1H, NH), 7.23 (m, 7H, ArH), 6.85 (d, 1H, ArH), 6.72 (m, 1H, ArH), 5.10 (m, 1H, CH),

3.83 (m, 2H, CH<sub>2</sub>), 2.71 (s, 1H, OH); <sup>13</sup>C NMR (125 MHz, CDCl<sub>3</sub>), δ (ppm): 168.96, 160.27, 137.55, 133.43, 127.92, 126.99, 125.52, 124.86, 117.85, 117.50, 113.16, 76.36, 75.72, 64.79, 54.30; IR (cm<sup>-1</sup>, KBr): 3413, 3174, 1639, 1587, 1371, 1242, 1047, 756; MS (ESI): *m/z* 257.11 (M + H<sup>+</sup>).

### Synthesis of *N*-(*o*-propargyloxybenzoyl)-L-phenylglycinol (**3**):

Into a solution of the intermediate **2** (5.14 g, 20 mmol) in acetone (20 mL) were added propargyl bromide (2.62 g, 22 mmol) and K<sub>2</sub>CO<sub>3</sub> (9.7 g, 70 mmol). After stirring the reaction mixture at room temperature for 10 h, the solvent was removed *in vacuo*. The resulting solid matter was recrystallized from ethyl acetate : hexane (1:5) to give the target product *N*-(*o*-propargyloxybenzoyl)-L-phenylglycinol (**3**) in yield 73 % (4.58 g, white solid). Mp: 101.3–101.8°C; <sup>1</sup>H NMR (400 MHz, CDCl<sub>3</sub>), δ (ppm): 8.46 (d, 1H, NH), 8.14 (d, 1H, ArH), 7.32 (m, 6H, ArH), 7.07 (m, 1H, ArH), 6.95 (d, 1H, ArH), 5.26 (m, 1H, CH), 4.74 (s, 2H, CH<sub>2</sub>), 3.91 (m, 2H, CH<sub>2</sub>), 2.56 (s, 1H, OH), 2.50 (s, 1H, C≡H); <sup>13</sup>C NMR (125 MHz, CDCl<sub>3</sub>), δ (ppm): 164.1, 154.3, 137.9, 131.6, 131.1, 127.4, 126.3, 125.5, 120.9, 120.5, 111.3, 76.0, 75.7, 75.5, 75.4, 65.9, 55.7, 55.3; IR (cm<sup>-1</sup>, KBr): 3386, 2129, 1639, 1529, 1300, 1219, 756; MS (ESI): *m/z* 296.3 (M + H<sup>+</sup>).

### Spectroscopic data

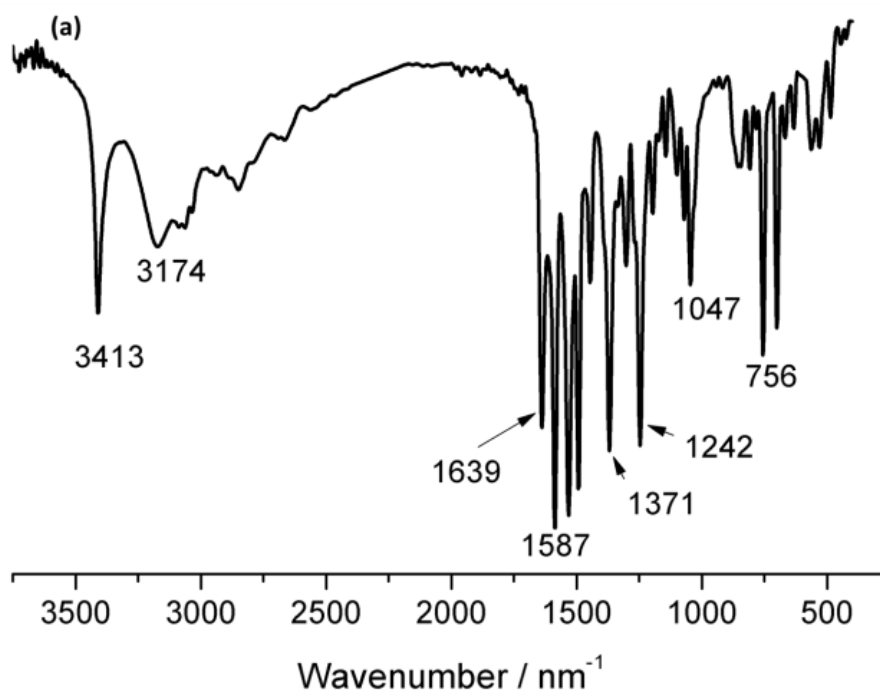

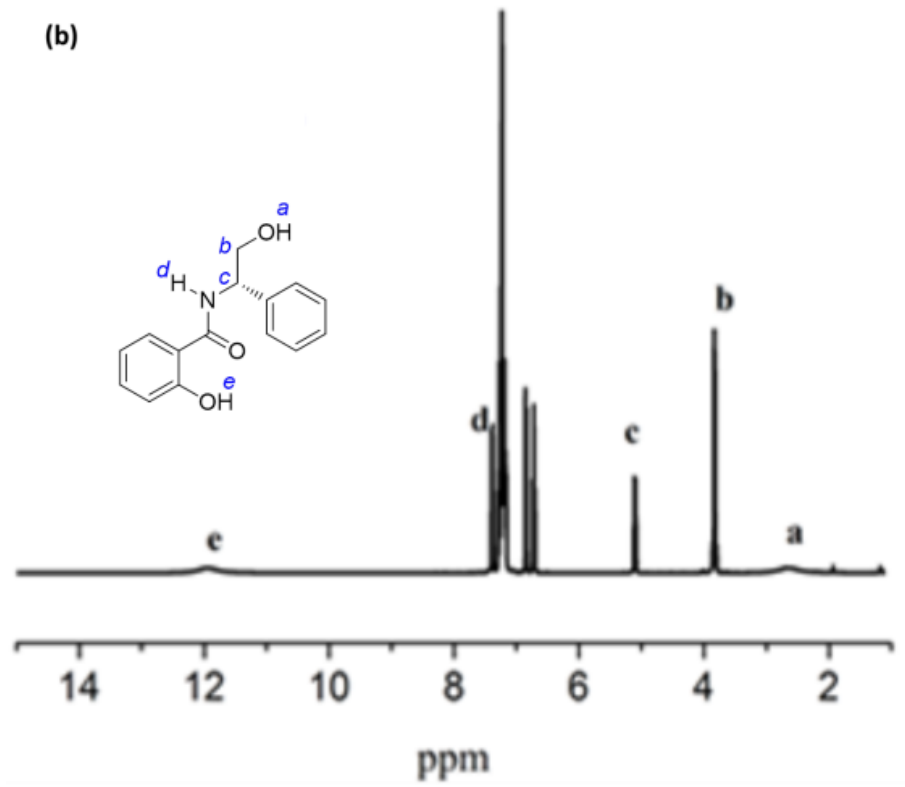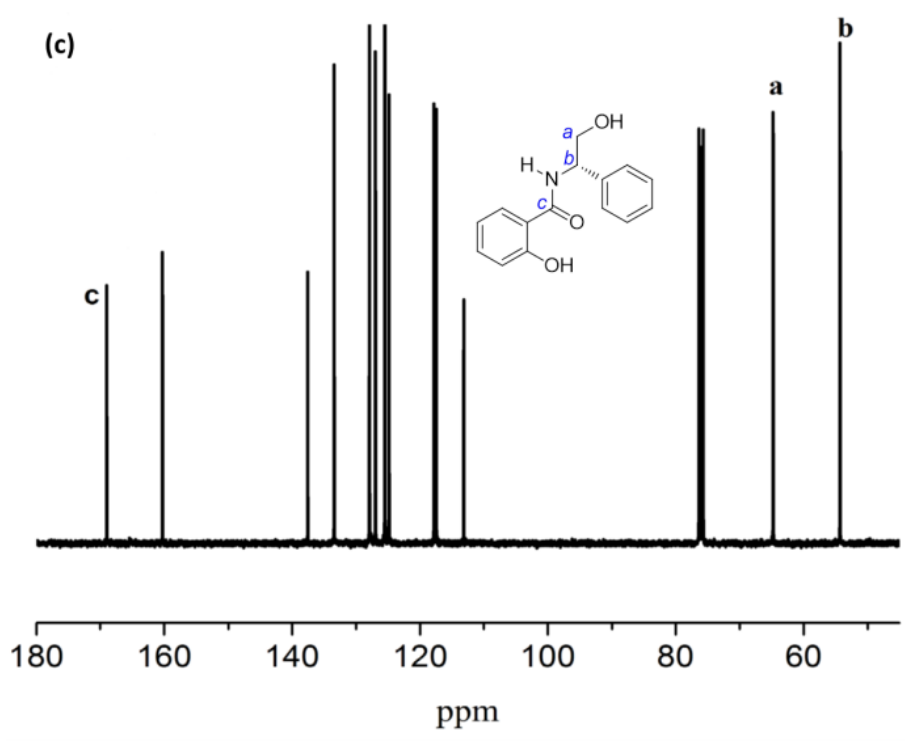

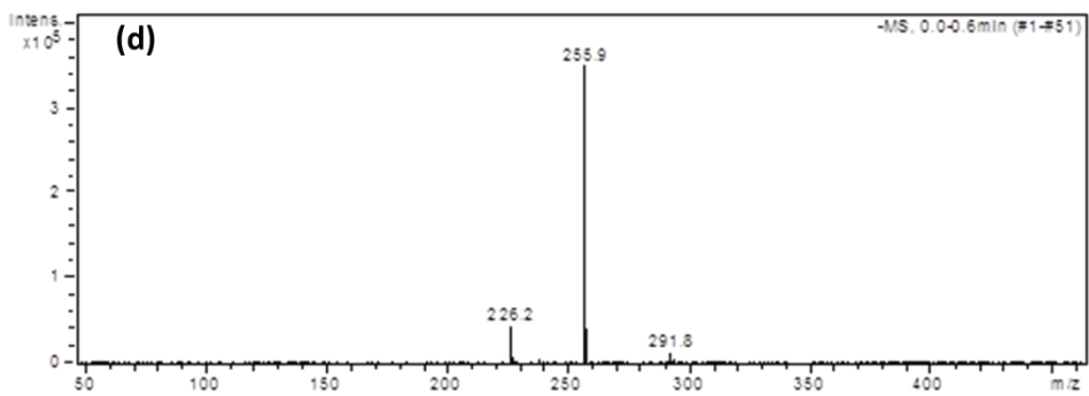

**Figure S1** (a) IR, (b)  $^1\text{H}$  NMR, (c)  $^{13}\text{C}$  NMR, and (d) ESI-MS spectra of the intermediate **2**.

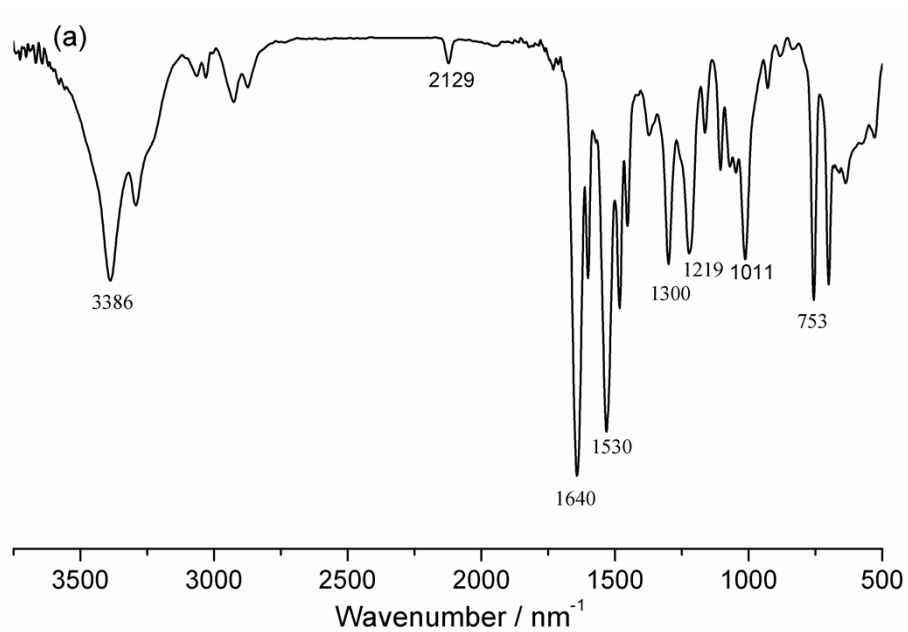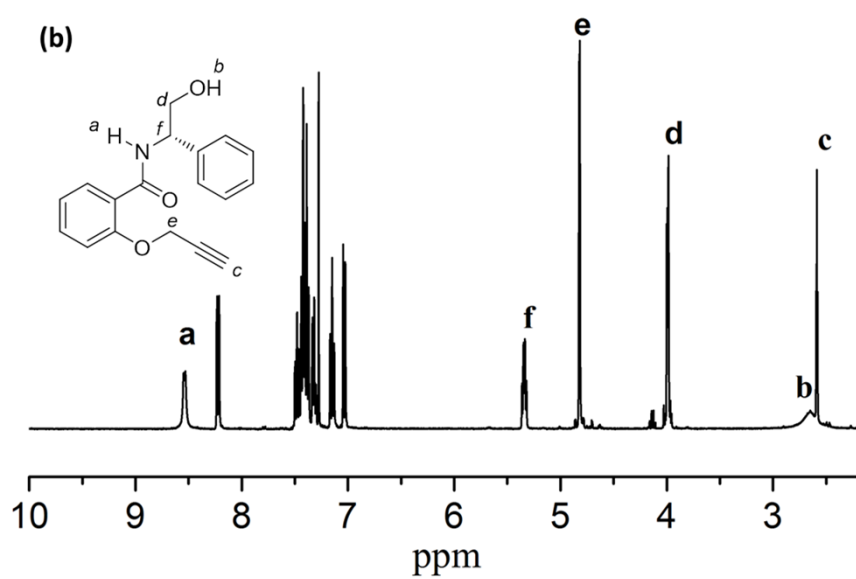

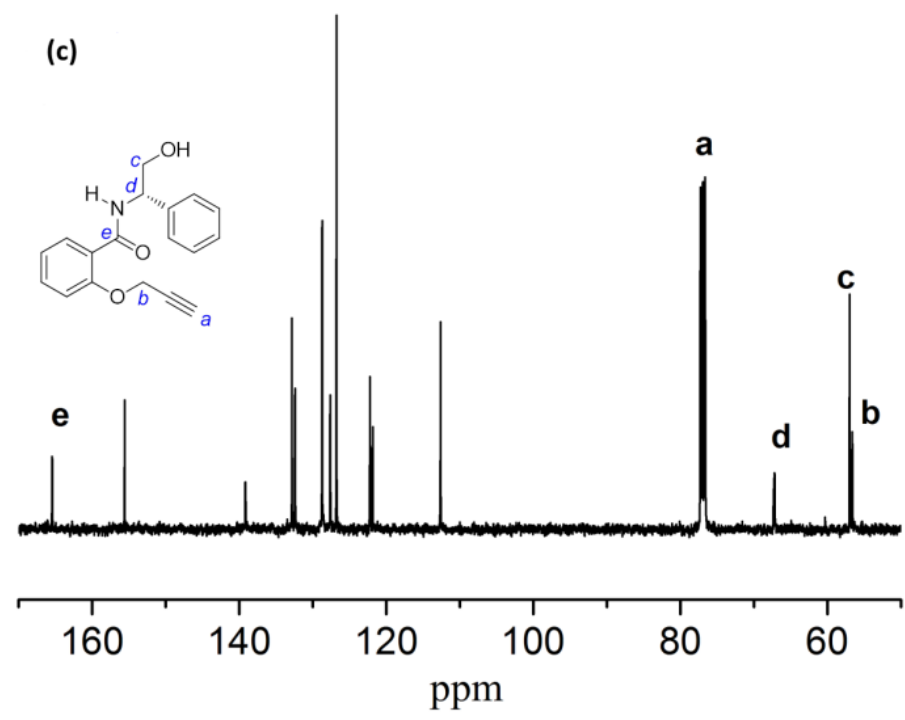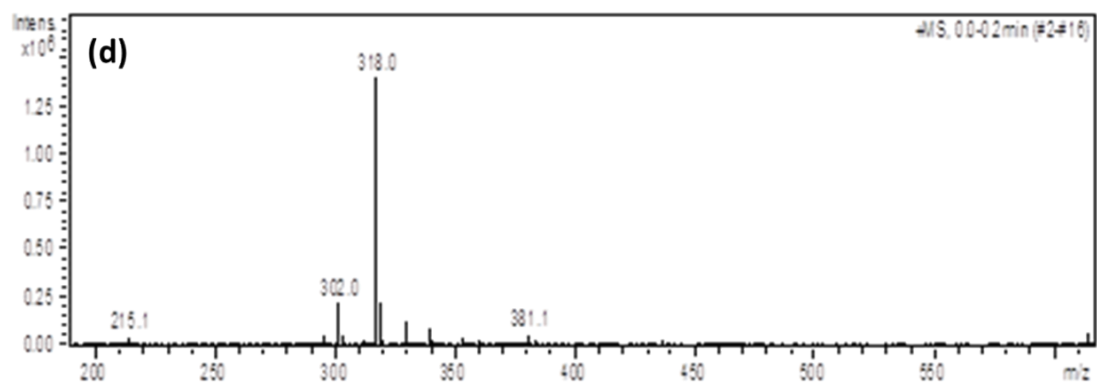

**Figure S2** (a) IR, (b) <sup>1</sup>H NMR, (c) <sup>13</sup>C NMR, and (d) ESI-MS spectra of the probe **3**.

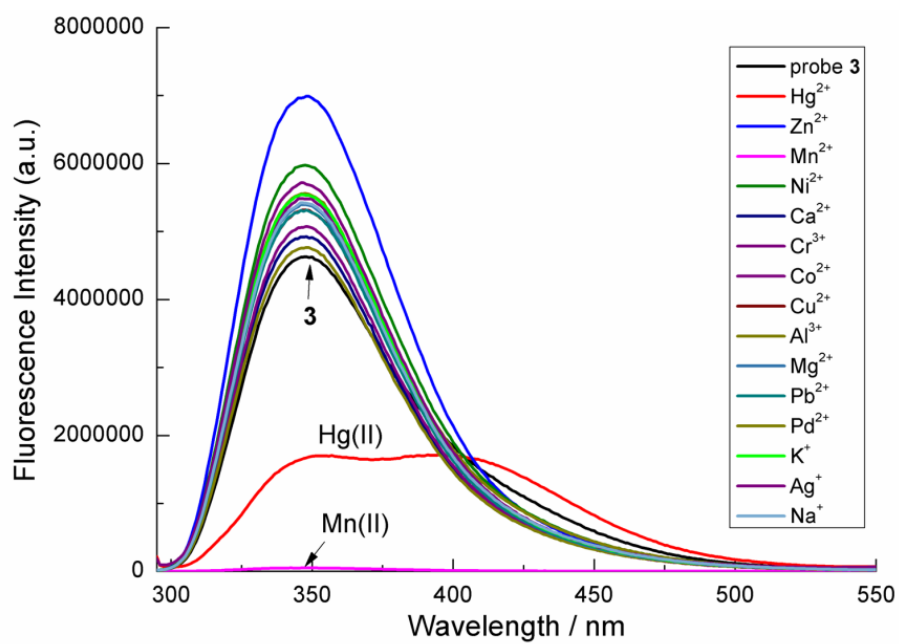

**Figure S3** Fluorescence spectra of probe **3** ( $10^{-4}$  M) in HOAc-NaOAc buffer (pH 4) upon addition of different metal ions (6 equiv.) at room temperature, reaction time = 10 min,  $\lambda_{\text{ex}} = 350$  nm.



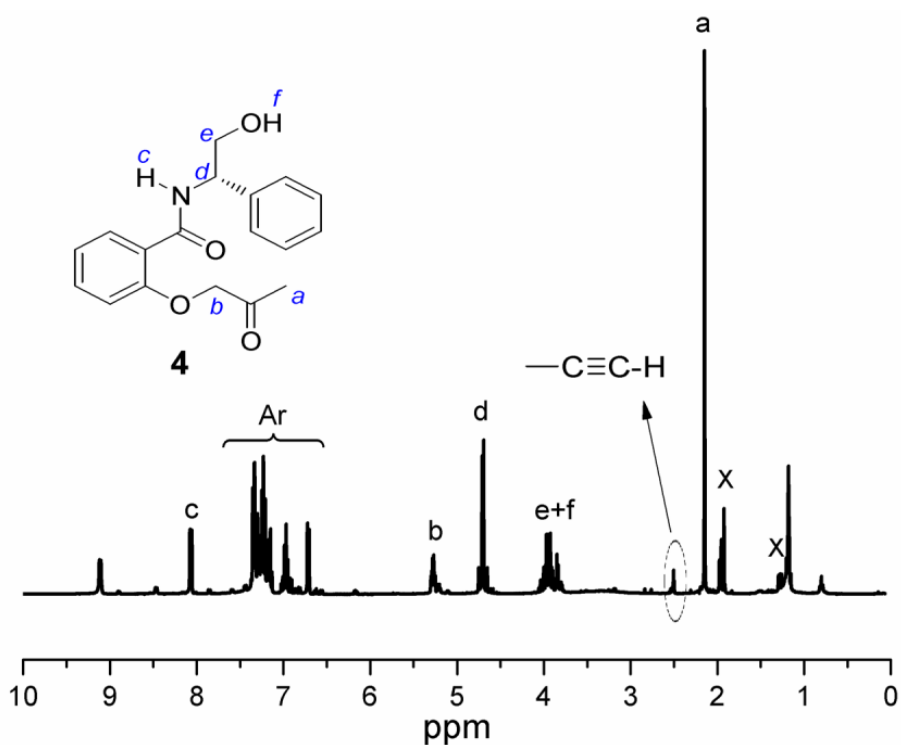

**Figure S4** <sup>1</sup>H NMR spectrum (400 MHz, CDCl<sub>3</sub>) of the oxymercuration product (**4**) of probe **3**. Protocol: A 100 mM aqueous solution of Hg(ClO<sub>4</sub>)<sub>2</sub> (30 μL) was added to a 0.1 mM solution of **3** in HOAc-NaOAc buffer (pH 4) containing 1% methanol (5 mL). The resulting mixture was stirred at room temperature for 10 min and then extracted with EtOAc (2 × 15 mL). The combined organic layers were washed with brine, dried over Na<sub>2</sub>SO<sub>4</sub>, filtered, and evaporated under reduced pressure. The obtained residue was directly dissolved in CDCl<sub>3</sub> for <sup>1</sup>H NMR measurements. The signals marked with “x” are probably from the remaining ethyl acetate.

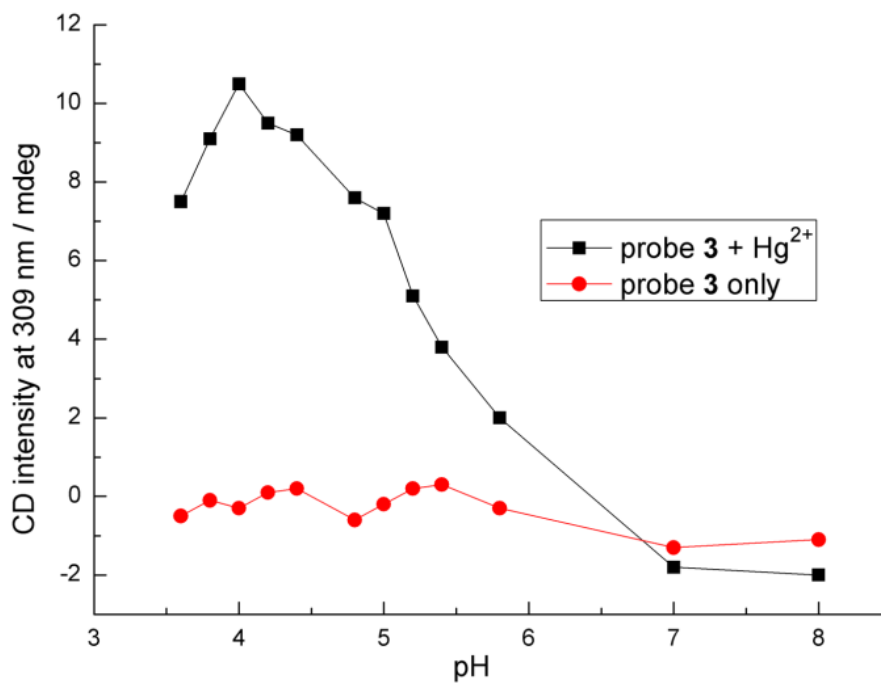

**Figure S5** CD intensity of probe **3** (100  $\mu\text{M}$ ) with the pH value monitored at  $\lambda = 309$  nm. The CD measurements were conducted in NaOAc-HOAc buffer solution (containing 1% methanol) after mixing **3** with 6 equivalents of  $\text{Hg}(\text{ClO}_4)_2$  at room temperature for 10 min.
